# Supplementary material for: DNA damage triggers squamous metaplasia in human lung and mammary cells via mitotic checkpoints
Source: PubMed Central journal article supplement (PMC9867756; doi:10.1038/s41420-023-01330-3), 2023-01-21
Supplement: 41420_2023_1330_MOESM2_ESM.pdf [file 41420_2023_1330_MOESM2_ESM.pdf]

Supplementary Information  
San Juan et al

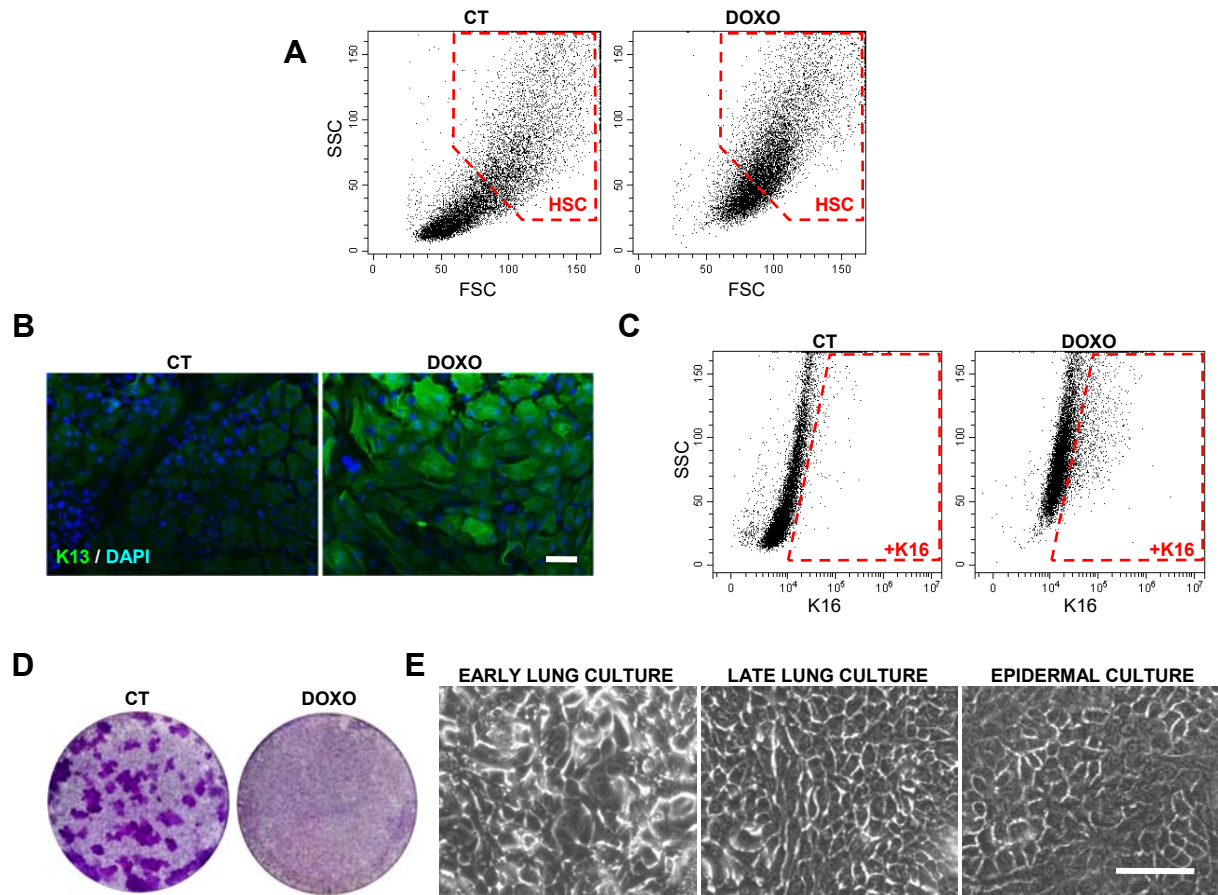

**Suppl. Figure 1. Doxorubicin induces squamous metaplasia in human lung epithelial cells.** Human primary lung epithelial cells were treated with dimethyl sulfoxide (CT) or with 0.5  $\mu\text{M}$  Doxorubicin (DOXO) for 48 h as indicated. **A**, Representative flow-cytometry analyses for light scatter parameters (HSC, cells with high light scatter). **B**, Immunofluorescence for keratin K13 (green). Blue is nuclear DNA by DAPI. Scale bar, 50  $\mu\text{m}$ . **C**, Representative flow-cytometry analyses for the squamous differentiation marker keratin K16 (+K16, positive cells). **D**, Clonogenic capacity of cells plated and drug-released after the indicated 48 h treatments. **E**, Phase contrast images of early (left) or late (center) cultures of primary human lung epithelial cells or primary human epidermal keratinocytes (right) in FAD-serum medium, hyperproliferative conditions. Scale bar, 50  $\mu\text{m}$ . Positive cells by flow cytometry were gated according to negative isotype antibody control. Data are representative of 2-3 independent experiment from two different human individuals with similar results.

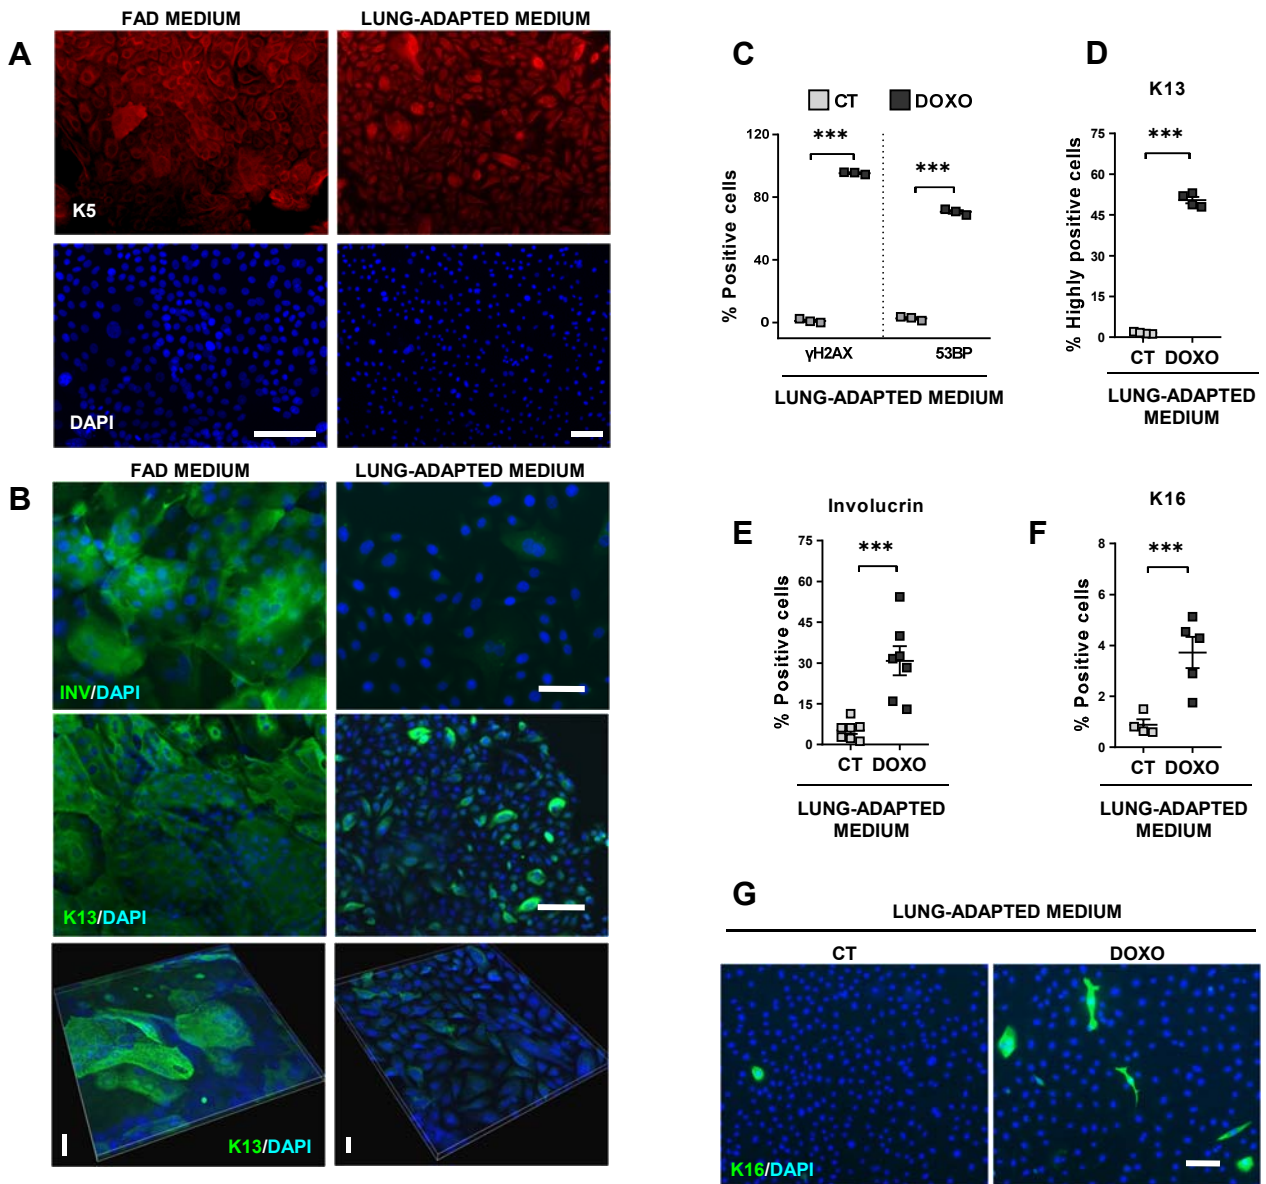

**Suppl. Figure 2. Doxorubicin induces squamous differentiation in human lung epithelial cells in a lung-adapted serum-free medium.** **A-B**, Human primary lung epithelial cells isolated and cultured in FAD (left) or in lung-adapted medium (right). Immunofluorescence for K5 (A; red, top), involucrin (B; inv, green; top), or keratin K13 (B; green; center and bottom). Blue is nuclear DNA by DAPI. Scale bar, 100  $\mu$ m (A), 50  $\mu$ m (B, top, center). Bottom in B: Representative three-dimensional confocal microscopy reconstructions. Vertical scale bar in Z, 25  $\mu$ m. **C-G**, Human primary lung epithelial cells in lung-adapted medium were treated for 48 h with dimethyl sulfoxide only (CT) or with 0.5  $\mu$ M Doxorubicin (DOXO). (C-F) Quantitations by immunofluorescence for: (C) percent of  $\gamma$ H2AX positive cells (left), percent of cells displaying a 53BP dotted pattern (right); (D) percent of keratin K13 positive cells; (E) percent of involucrin positive cells; (F) percent of keratin K16 positive cells. (G) Representative immunofluorescence of CT or DOXO cells for keratin K16 (green). Blue is nuclear DNA by DAPI. Scale bar, 100  $\mu$ m. Data are mean  $\pm$  SEM of 3-7 randomly selected fields, representative of 2 independent experiments. \*\*\* $p < 0.001$ .

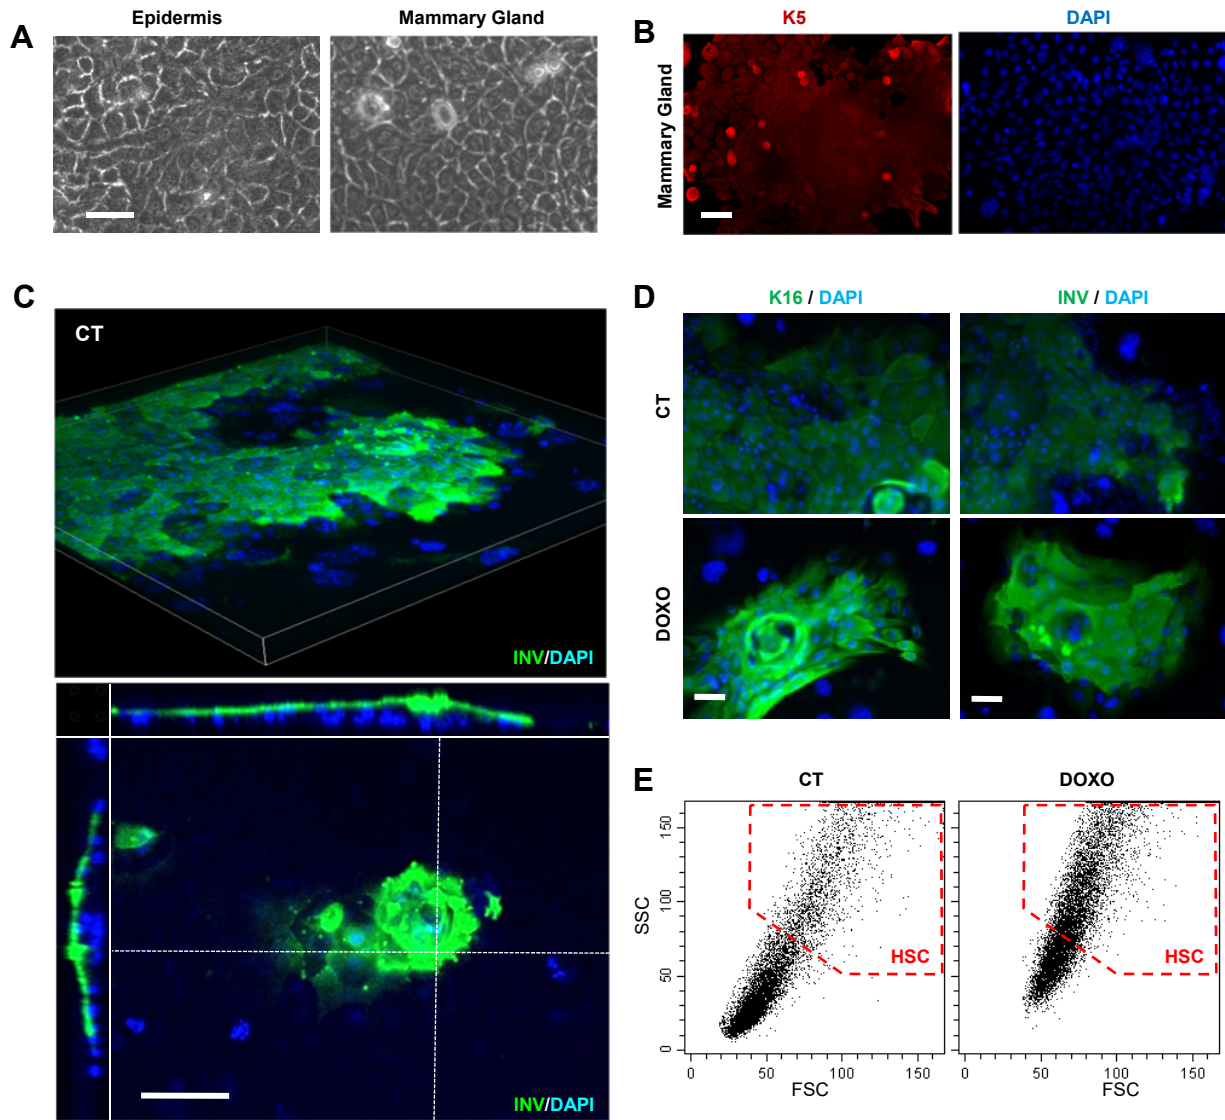

**Suppl. Figure 3. Human mammary gland epithelial cells undergo squamous metaplasia upon hyperproliferative stimuli or DOXO treatment.** **A,B,** Human epidermal keratinocytes or mammary gland epithelial cells, as indicated, cultured in FAD-serum medium. (A) Phase contrast microscopy images. (B) Immunofluorescence for K5 (red), or nuclear DNA by DAPI (blue). Scale bar, 50  $\mu\text{m}$  (A,B). **C,** Top: Three-dimensional confocal microscopy reconstruction of immunofluorescence for involucrin (green) of untreated human mammary gland epithelial cells in FAD medium. Blue is nuclear DNA by DAPI. Bottom: orthogonal view of the same field (same colony in the top) by confocal analysis. **D-E,** Human primary mammary gland epithelial cells were treated with dimethyl sulfoxide (CT) or 0.5  $\mu\text{M}$  Doxorubicin (DOXO) for 48 h as indicated. (D) Representative immunofluorescence for keratin K16 (green) or involucrin (green), as indicated. Blue is nuclear DNA by DAPI. Scale bar, 50  $\mu\text{m}$ . (E) Representative flow-cytometry analyses for light scatter parameters of CT or DOXO-treated cells (HSC, cells with high light scatter). Data are representative of two independent experiment from two different human individuals with similar results.

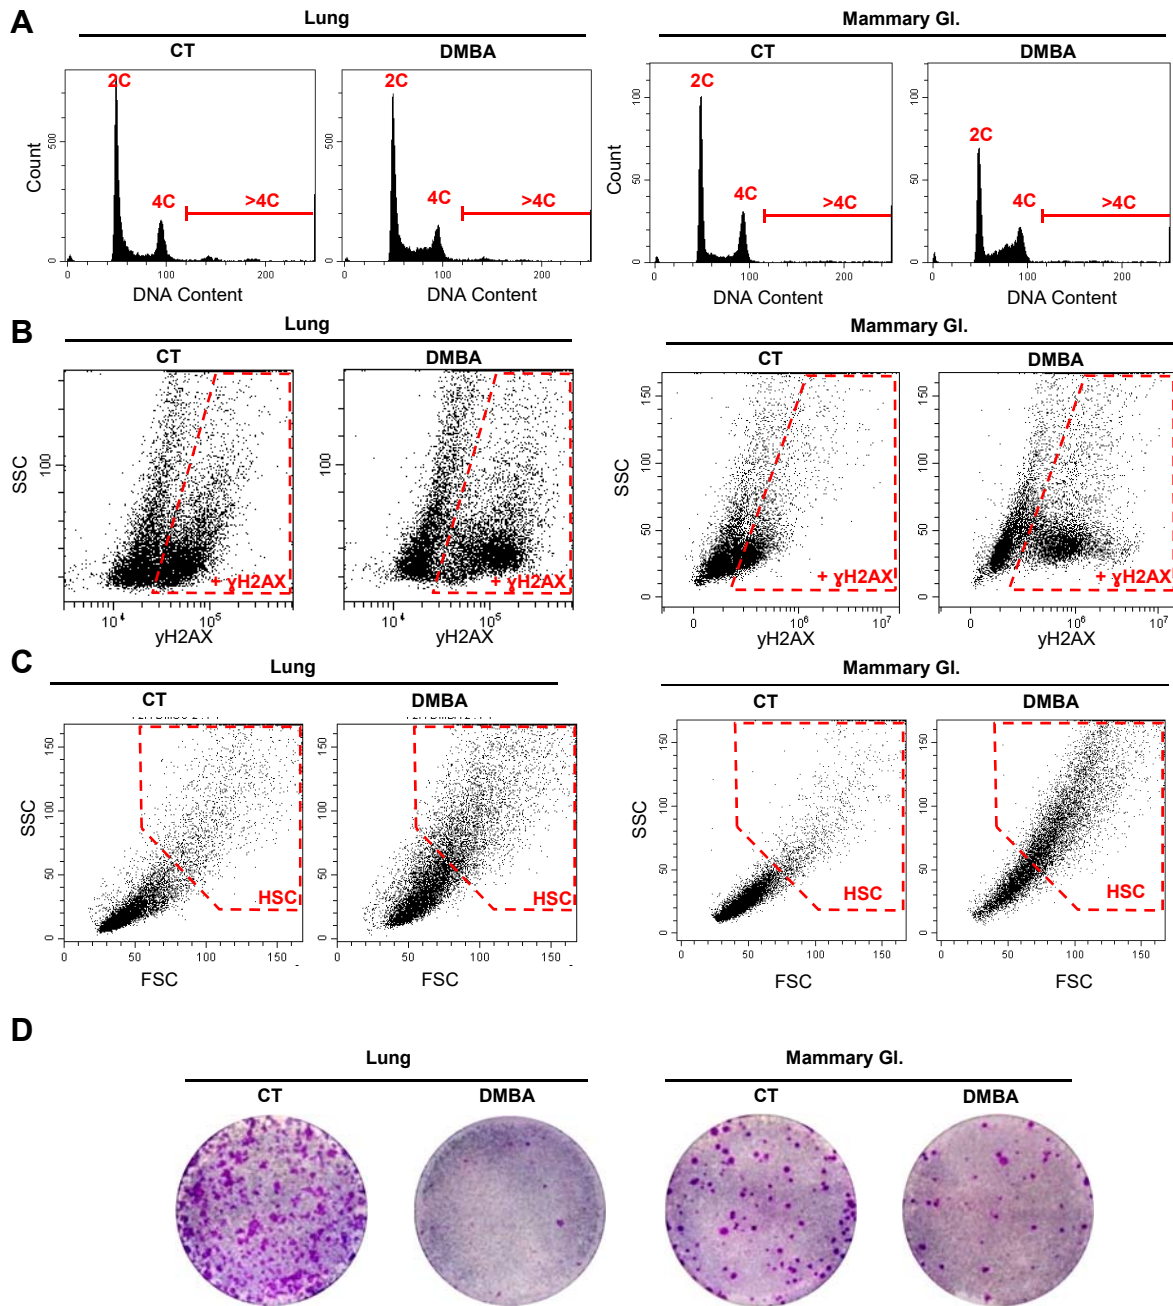

**Suppl. Figure 4. Lung and mammary gland epithelial cells undergo squamous metaplasia in the presence of tobacco carcinogen DMBA.** Human primary lung or mammary gland (mammary gl.) epithelial cells were treated with dimethyl sulfoxide (CT) or with  $1 \mu\text{gml}^{-1}$  of 7,12-Dimethylbenz(a)anthracene (DMBA) for 24 h (A, B) or 72 h (C, D). **A**, Representative flow cytometry analyses of DNA content (2C, 4C and >4C indicate diploid, tetraploid and polyploid cells respectively). **B**, Representative flow-cytometry analyses for the DNA damage marker  $\gamma$ H2AX (+ $\gamma$ H2AX, positive cells). **C**, Representative flow-cytometry analyses for light scatter parameters of cells treated as indicated (HSC, cells with high light scatter). **D**, Clonogenic capacity of cells plated after a 72 h treatment and drug-released. Positive cells by flow cytometry were gated according to negative isotype antibody control. Data are representative of 2-3 independent experiment from two different human individuals with similar results.



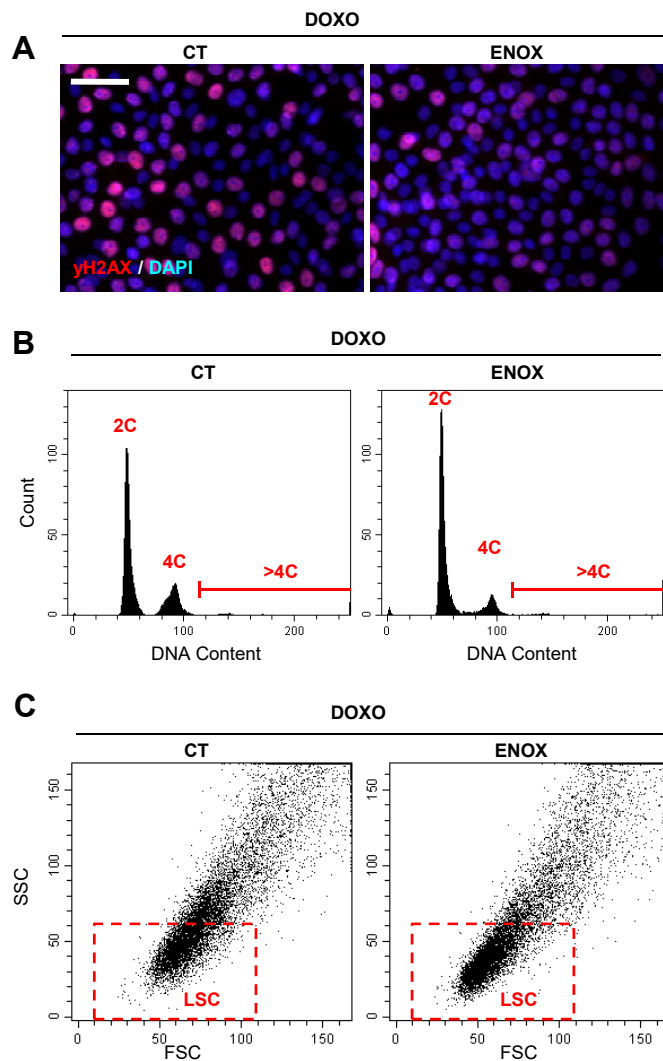

**Suppl. Figure 5. Enhancement of DNA repair by ENOX suppresses Doxorubicin-induced squamous metaplasia in lung epithelial cells.** Human primary lung epithelial cells were treated with 0.5  $\mu$ M Doxorubicin (DOXO), dimethyl sulfoxide (CT) or 200  $\mu$ M Enoxacin (ENOX). **A**, Immunofluorescence for  $\gamma$ H2AX (red) of cells treated for 24 h as indicated. Blue is nuclear DNA by DAPI. Scale bar, 50  $\mu$ m. **B**, Representative flow cytometry analyses of DNA content of cells treated for 24 h as indicated (2C, 4C and >4C indicate diploid, mitotic/tetraploid and polyploid cells, respectively). **C**, Representative flow cytometry analysis of light scatter parameters (LSC, cells with low light scatter) of cells treated for 24 h as indicated. Data are representative of 2-3 independent experiment from two different human individuals with similar results.

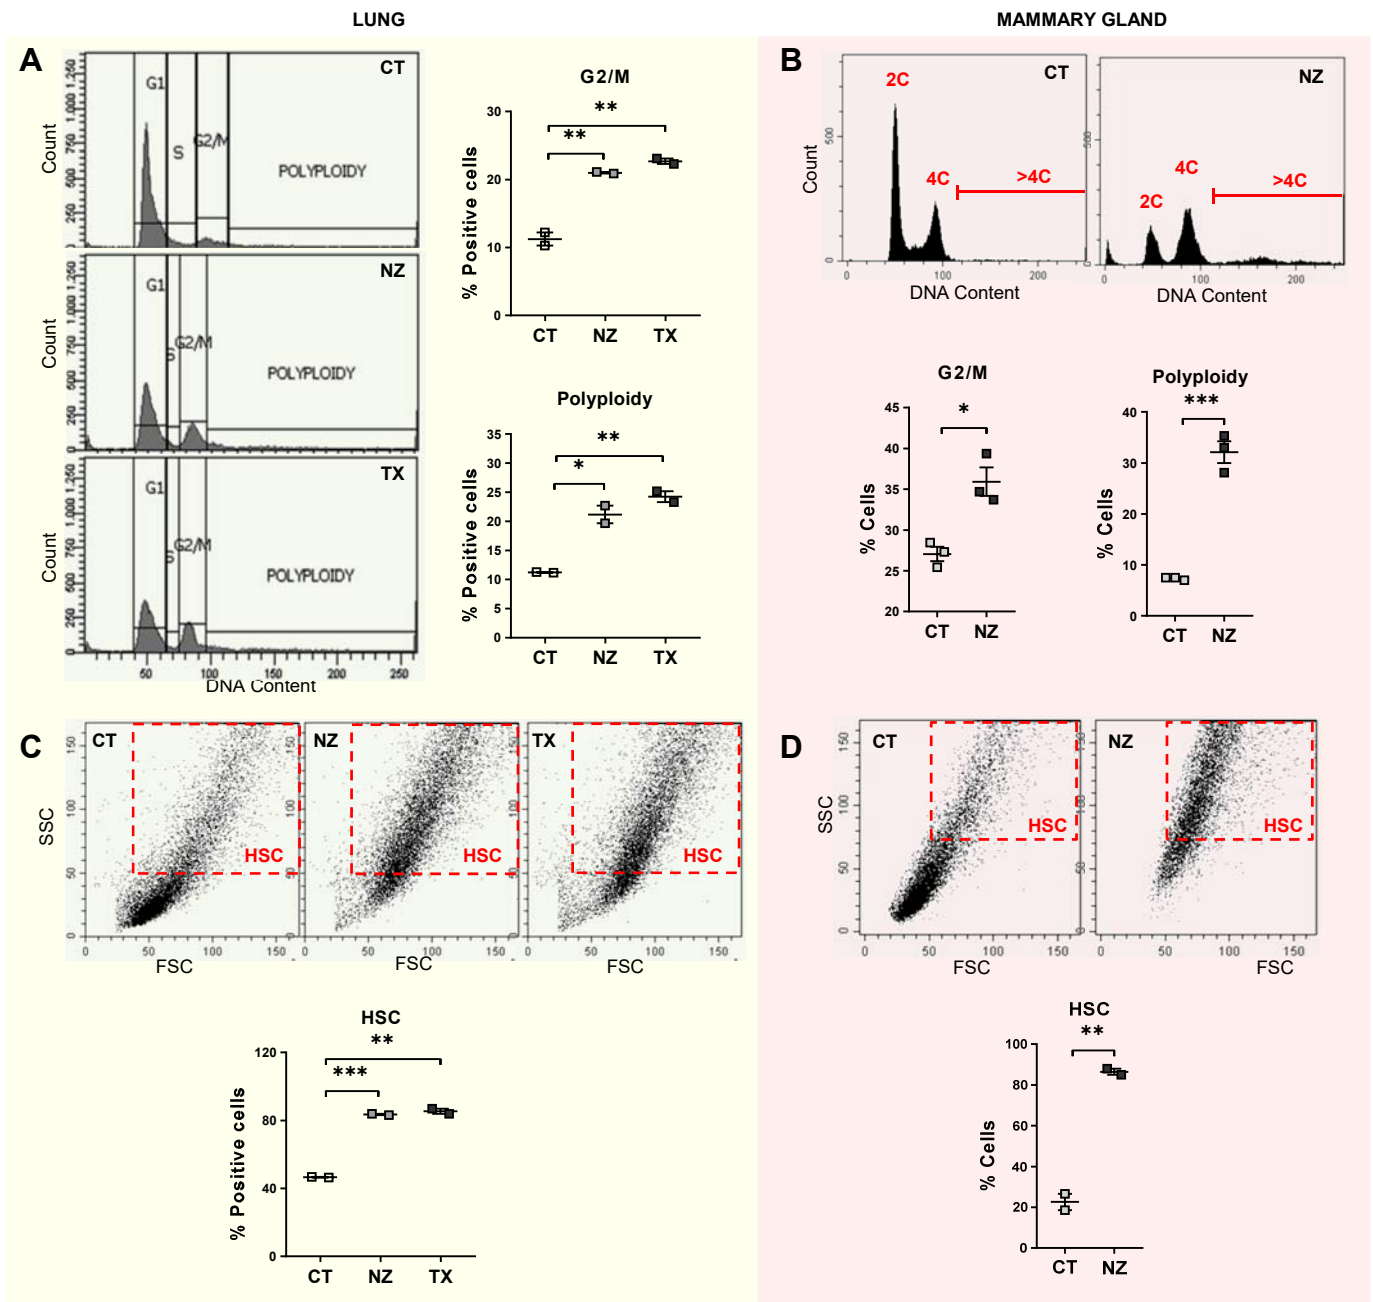

**Suppl. Figure 6. Nocodazole or Taxol mitosis inhibitor induces polyploidisation and increased cell size and complexity in primary human lung and mammary gland epithelial cells.** Human primary lung or mammary gland epithelial cells were treated with dimethyl sulfoxide only (CT), 20  $\mu$ M Nocodazole or 200  $\mu$ M Paclitaxel for 48 h. **A**, Left panels: Representative flow cytometry analyses of DNA content of lung epithelial cells treated as indicated. Right panels: scattered plots represent the percent of CT, NZ or TX cells in the G2/M phase of the cell cycle (top) or with >4C DNA content (bottom, polyplod). **B**, Top panels: representative flow-cytometry analyses of DNA content of mammary gland epithelial cells treated as indicated. Bottom panels: scattered plots represent the percent of CT or NZ cells in the G2/M phase of the cell cycle (left) or with >4C DNA content (right, polyplod). **C**, Top panels: Representative flow-cytometry analysis for light scatter parameters of lung epithelial cells treated as indicated (HSC, cells with high light scatter). Bottom panel: percent of CT, NZ- or TX-treated cells with high light scatter. **D**, Top panels: representative flow cytometry analyses of light scatter parameters of mammary gland epithelial cells treated as indicated. Bottom panel: percent of CT or NZ cells with HSC. Data are mean  $\pm$  SEM of 2-3 replicate samples, representative of 2 independent experiment from two different individuals. \*\*\* $p$   $\leq$  0.001, \*\* $p$   $\leq$  0.01, \* $p$   $\leq$  0.05.

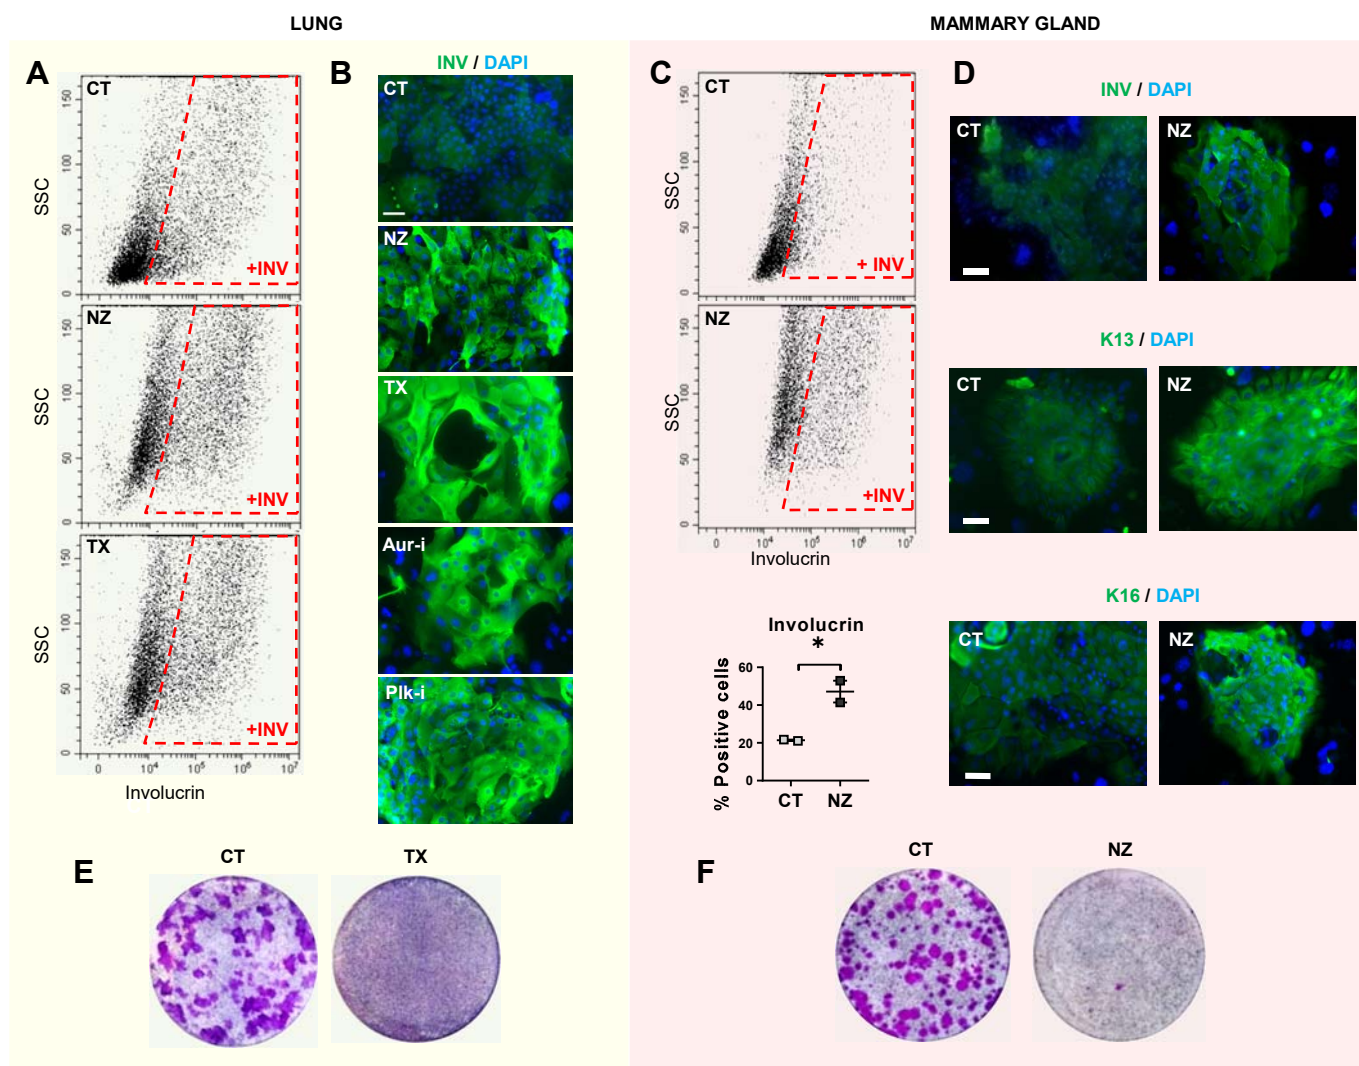

**Suppl. figure 7. Mitosis inhibition induces squamous differentiation in lung and mammary gland epithelial cells.** Human primary lung or mammary gland epithelial cells were treated as in Suppl. Figure 6, or with 2  $\mu\text{M}$  ZM44739 (Aur-i, Aurora B kinase inhibitor), or 100 nM BI2536 (PIk-i, Polo-like kinase inhibitor) for 48 h as indicated. **A**, Representative flow cytometry analyses for the differentiation marker involucrin (+INV, positive cells) of lung epithelial cells treated as indicated. **B**, Immunofluorescence for involucrin (green) of lung epithelial cells. Blue is nuclear DNA by DAPI. Scale bar, 50  $\mu\text{m}$ . **C**, Representative flow-cytometry analyses for the differentiation marker involucrin (+INV, positive cells) of mammary gland epithelial cells treated as indicated. Scattered plot displays the percentage of positive cells. **D**, Immunofluorescence for involucrin (INV, top), keratin K13 (center) or keratin K16 (bottom) of mammary gland epithelial cells treated as indicated. Blue is nuclear DNA by DAPI. Scale bar, 50  $\mu\text{m}$ . **E**, Clonogenic capacity of lung epithelial cells plated and drug-released and after a 48 h treatment with CT or TX, as indicated. **F**, Clonogenic capacity of mammary gland epithelial cells drug-released and plated after a 48 h treatment with CT or NZ. Positive cells by flow cytometry were gated according to negative isotype antibody control. Data are mean  $\pm$  SEM of duplicate samples, representative of 2 independent experiment from two different individuals. \* $p \leq 0.05$ .



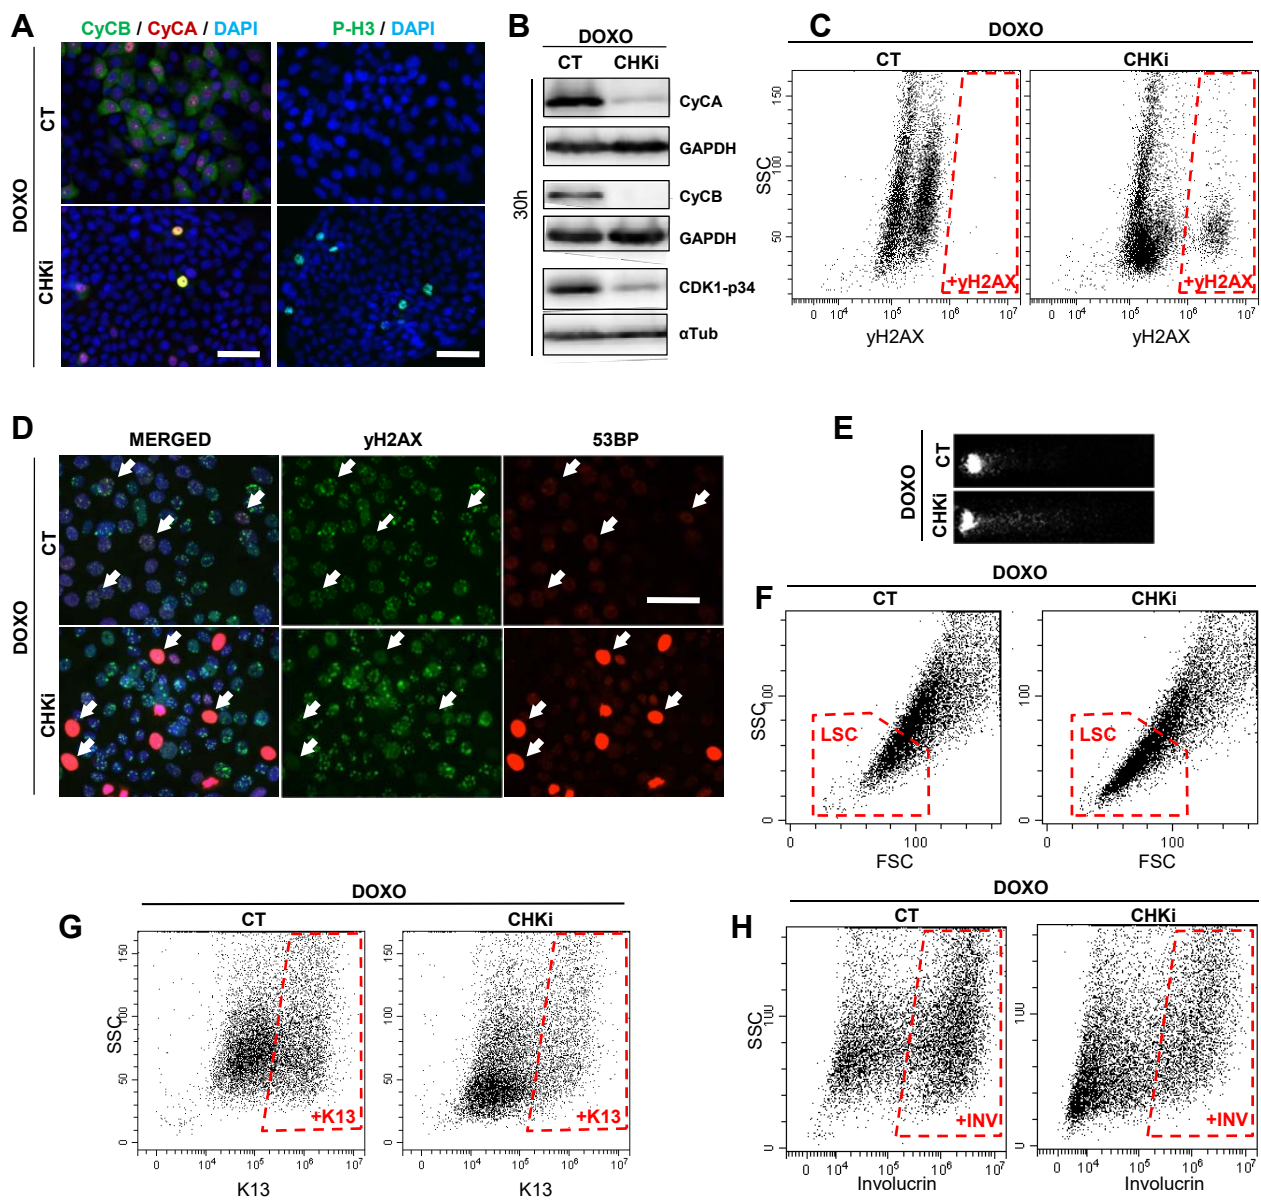

**Suppl. figure 8. Chk1/Chk2 inhibition impairs DNA repair and attenuates Doxorubicin-induced squamous metaplasia in lung epithelial cells.** Human primary lung epithelial cells were treated with 0.07  $\mu$ M Doxorubicin (DOXO) or with dimethyl sulfoxide (CT) or with dimethyl sulfoxide (CT) or with 0.5  $\mu$ M AZD7762 (CHKi, Chk1/Chk2 inhibitor). **A**, Left: Immunofluorescence for CyCB (green) and CyCA (red) of cells treated for 18 h as indicated. Right: Immunofluorescence for PH3 (green) of cells treated for 12 h as indicated. Blue is nuclear DNA by DAPI. Scale bars, 50  $\mu$ m. **B**, CyCA, CyCB and Cdk1-p34 by Western blotting on cells treated for 30 h as indicated. Glyceraldehyde 3-phosphate dehydrogenase (GAPDH) and  $\alpha$ -tubulin ( $\alpha$ Tub) are protein loading controls. **C**, Representative flow cytometry analyses for the DNA damage marker  $\gamma$ H2AX of cells treated for 24 h as indicated (+yH2AX, highly positive cells). **D**, Double immunofluorescence for 53BP (green) and  $\gamma$ H2AX (red) in cells treated for 24 h as indicated. Scale bar, 50  $\mu$ m. Note (white arrows) that while  $\gamma$ H2AX-positive CT cells show a dotted 53BP pattern typical of active DNA repair, strongly  $\gamma$ H2AX-positive CHKi-treated cells were negative for 53BP. **E**, Representative images of DNA damage monitored by comet assays of cells treated for 24 h as indicated. **F**, Representative flow-cytometry analyses of light scatter parameters of cells treated for 48 h as indicated. LSC, cells with low light scatter. **G**, Representative flow cytometry analyses for the differentiation marker keratin K13 (+K13, highly positive cells induced by DOXO) of cells treated for 24 h as indicated. **H**, Representative flow cytometry analyses for the differentiation marker involucrin (+INV1, positive cells) of cells treated for 48 h as indicated. Positive cells by flow cytometry were gated according to negative isotype antibody control. Data representative of 2-3 independent experiment from two different human individuals with similar results.

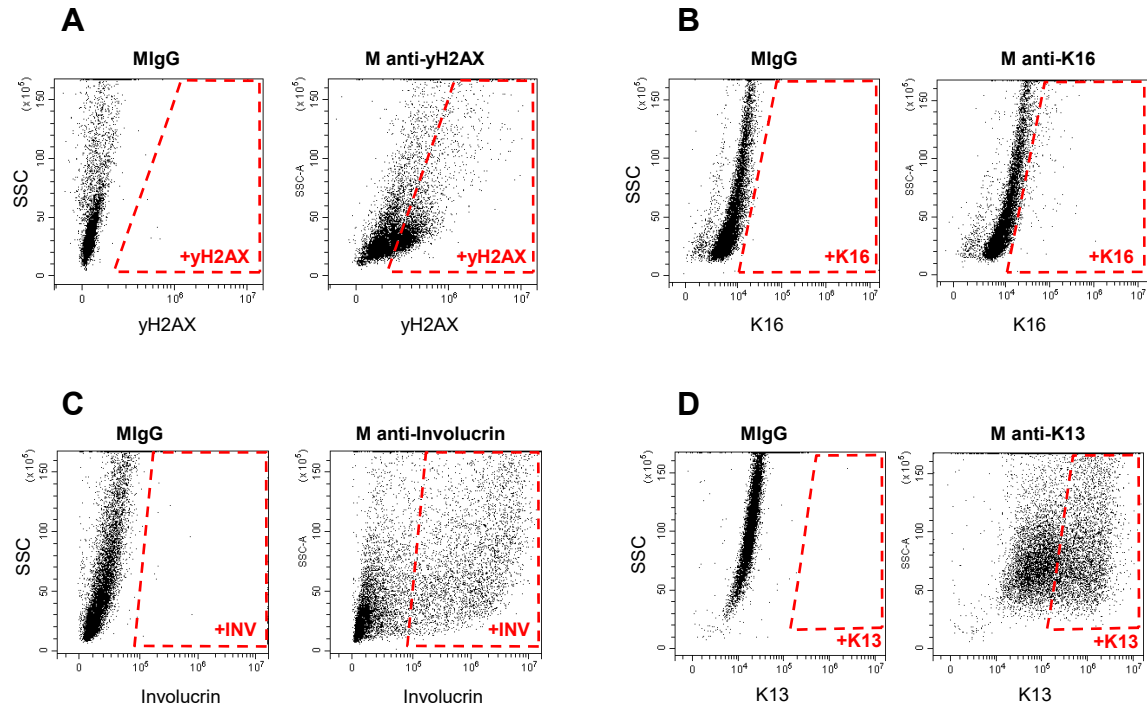

**Suppl. Figure 9. Negative isotype control for antibodies used in flow cytometry analysis.** Similar concentration of mouse (M) isotype negative immunoglobulins (IgG) was used as control for quantitation of positive cells in all antibody flow cytometry experiments. **A**, Mammary gland cells stained with MIgG or M anti- $\gamma$ H2AX antibody. **B**, Lung cells stained with MIgG or M anti-K16 antibody. **C**, Lung cells stained with MIgG or M anti-Involucrin antibody. **D**, Lung cells stained with MIgG or M anti-K13 antibody. Red broken line gates positive cells (A-C), or highly positive cells induced by DOXO (D).

**Suppl. Video 1.** Moving three-dimensional confocal reconstruction of mammary gland epithelial cells immunostained for involucrin (green). DAPI in blue for DNA. Frames were collected every 2  $\mu\text{m}$  in the Z axis, which was scaled up 0.5 times (to 1.5  $\mu\text{m}$ ).
