# Supplementary material for: DNA damage triggers squamous metaplasia in human lung and mammary cells via mitotic checkpoints
Source: PubMed Central journal article supplement (PMC9867756; doi:10.1038/s41420-023-01330-3), 2023-01-21

# Original western blots

SAN JUAN ET AL

# WB FIG. 6

SAN JUAN ET AL

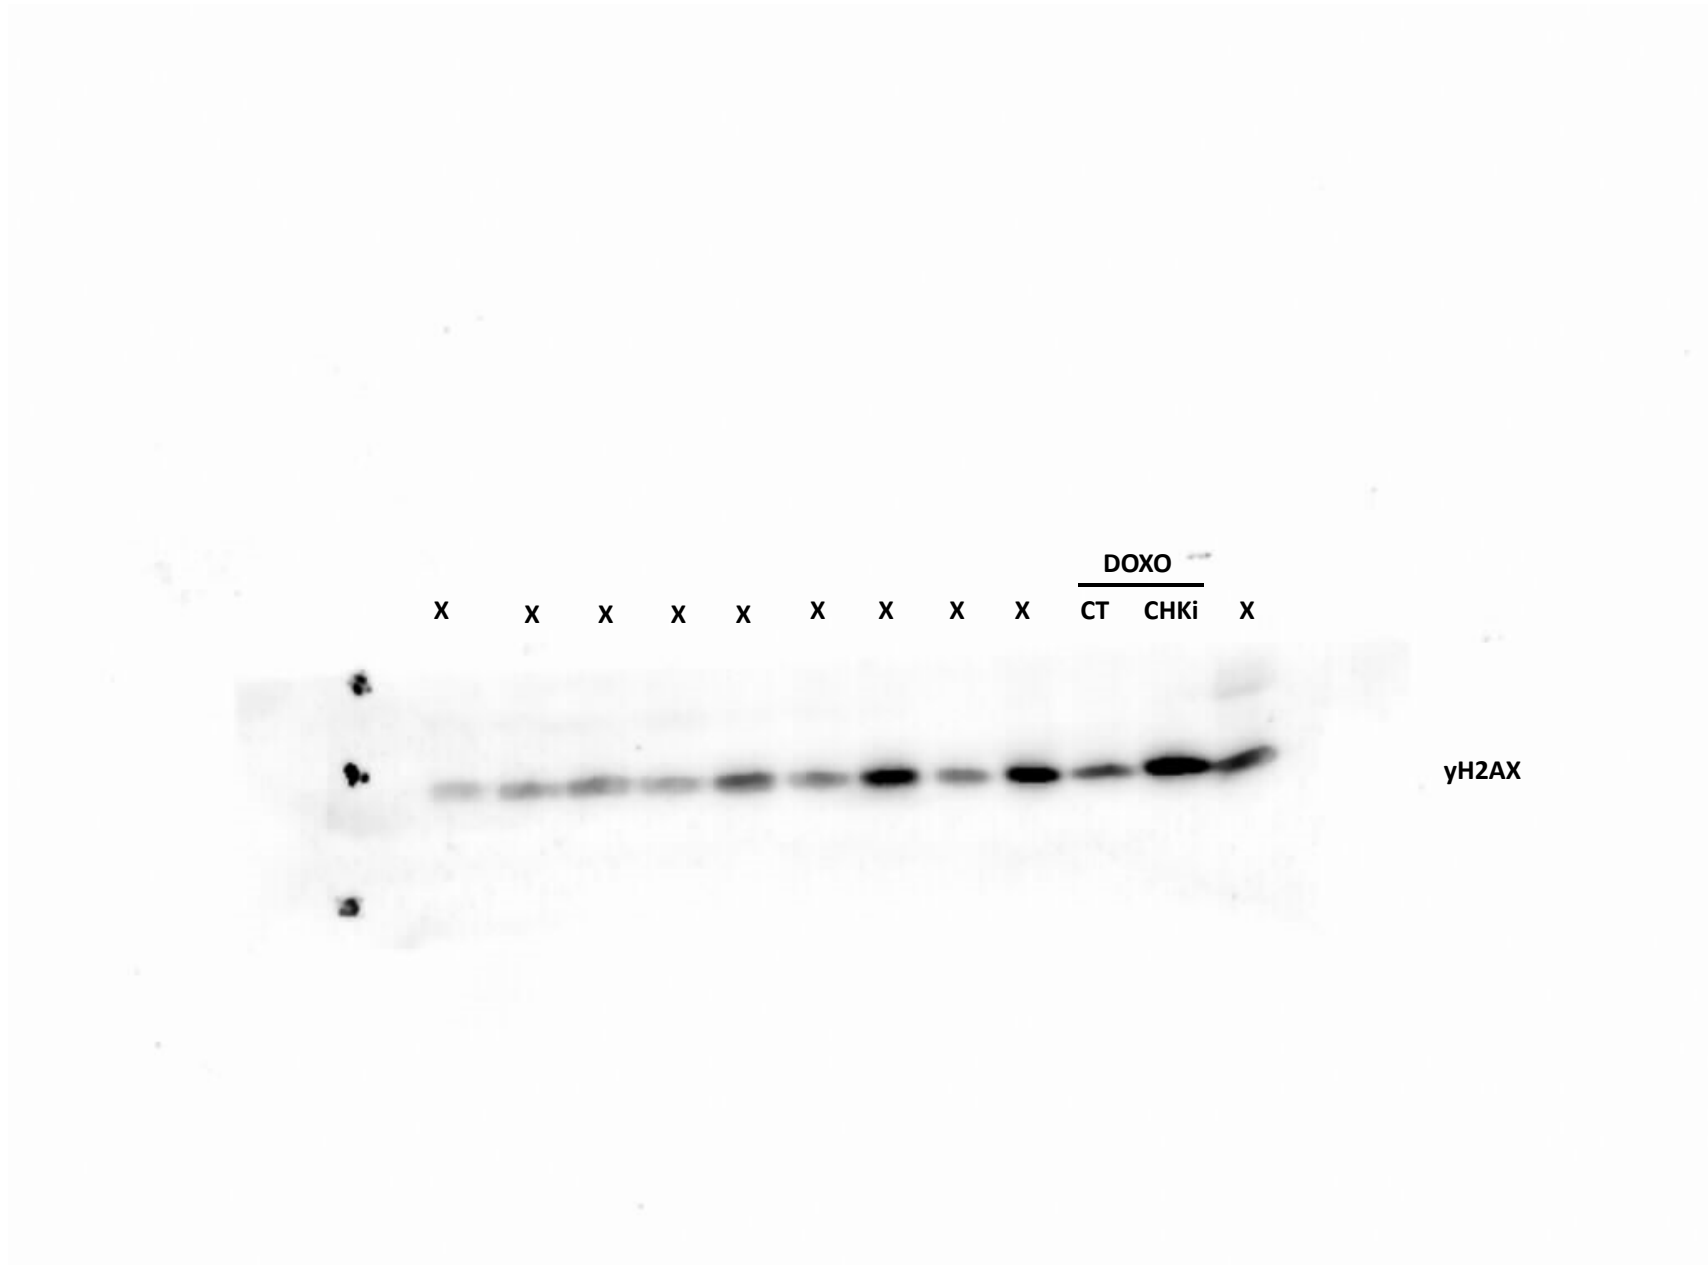

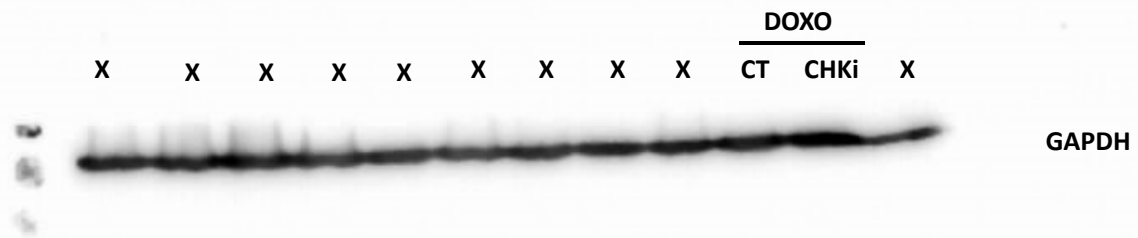

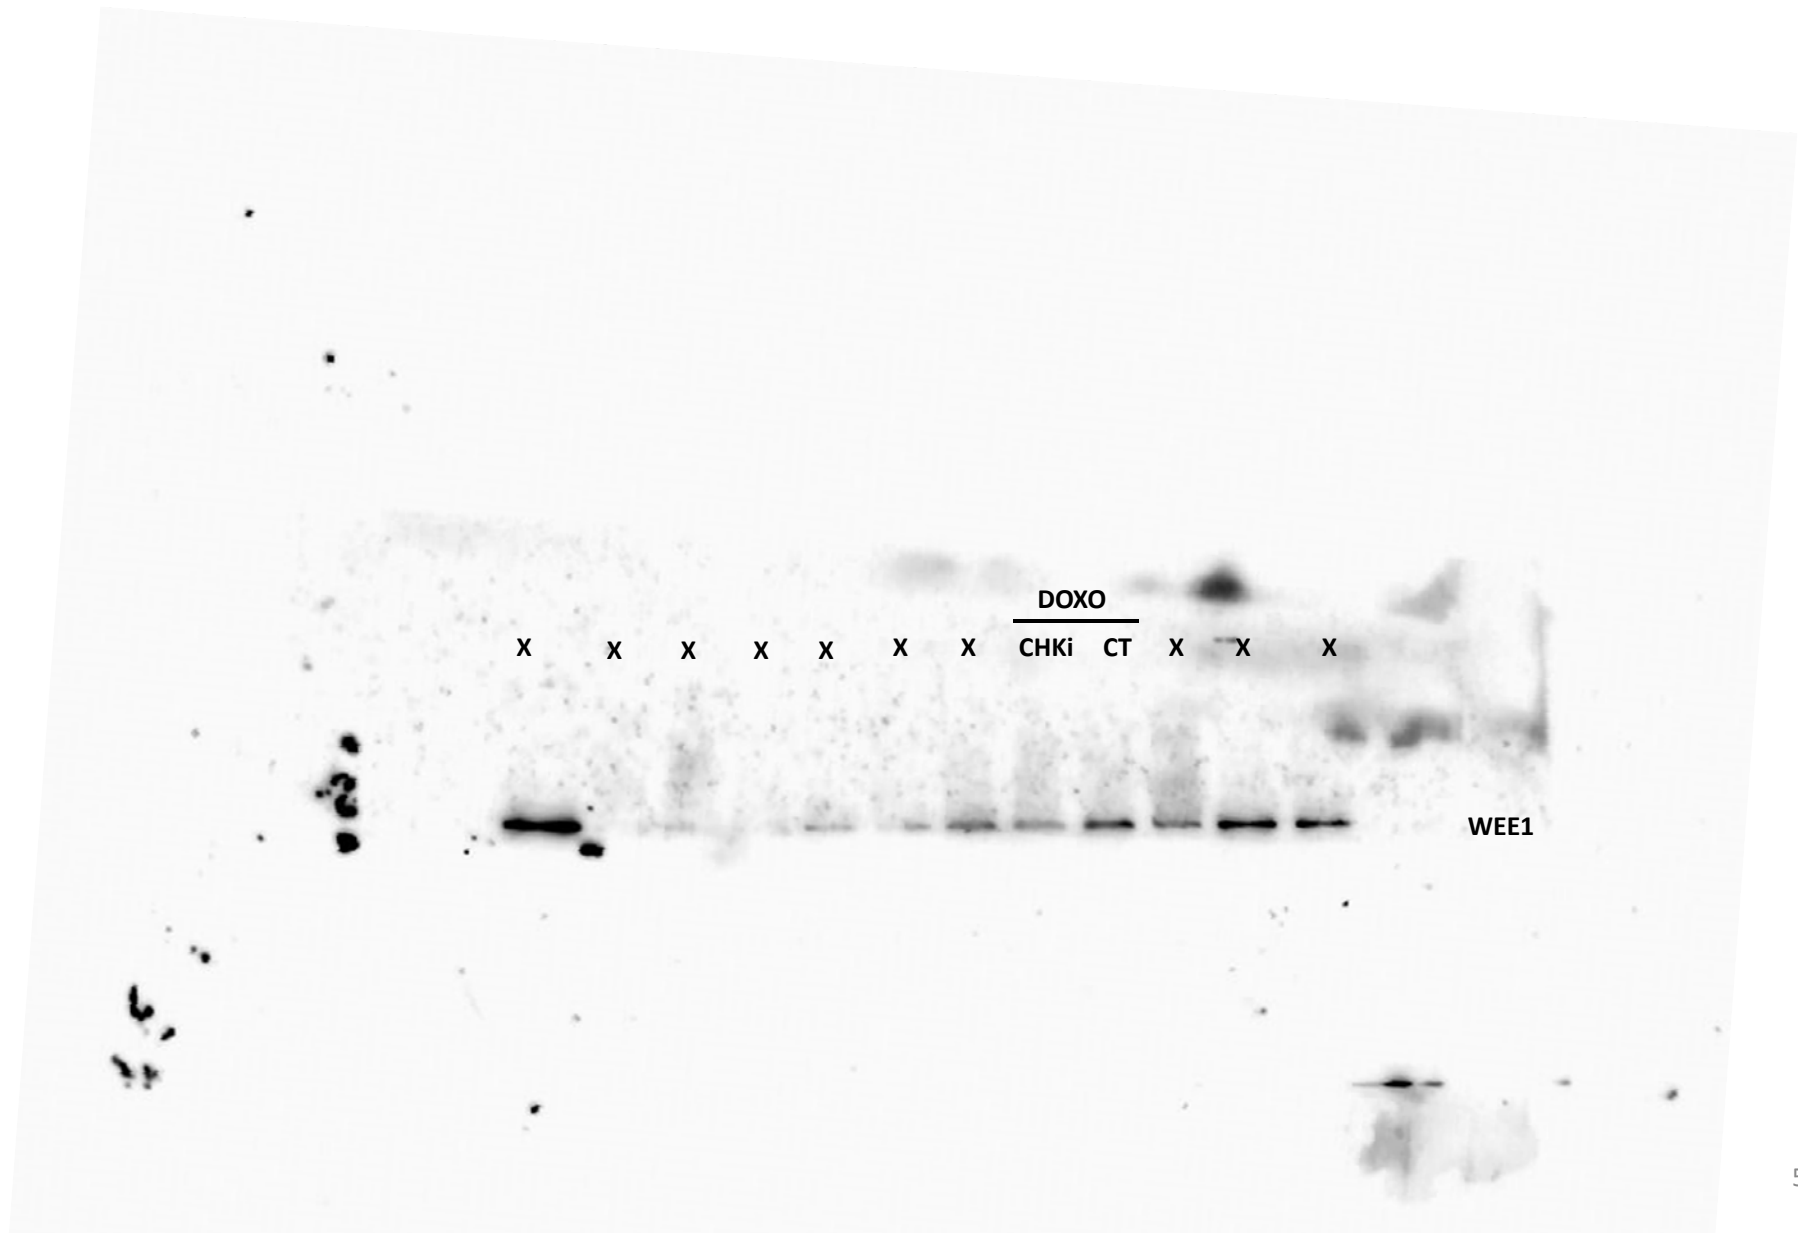

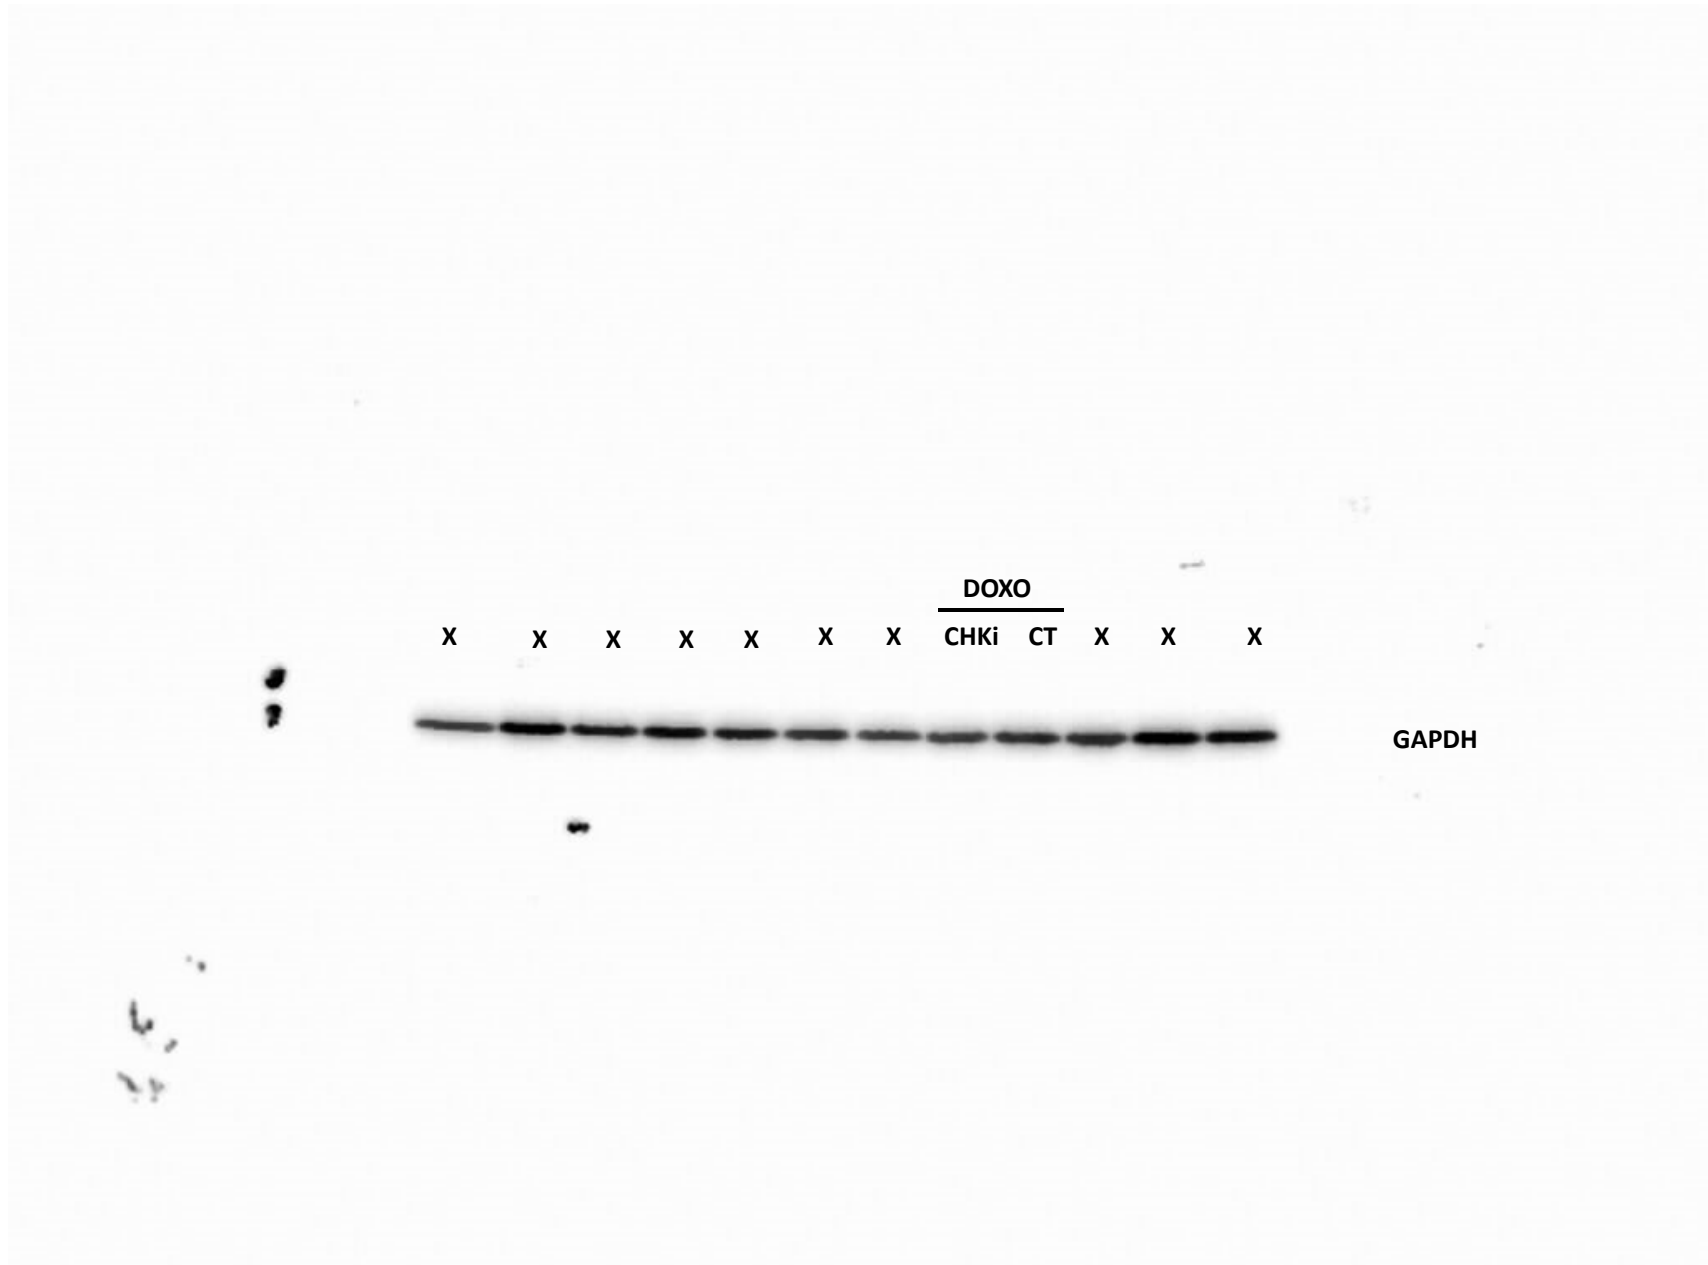

# WB SUPPL. FIG. 8

SAN JUAN ET AL

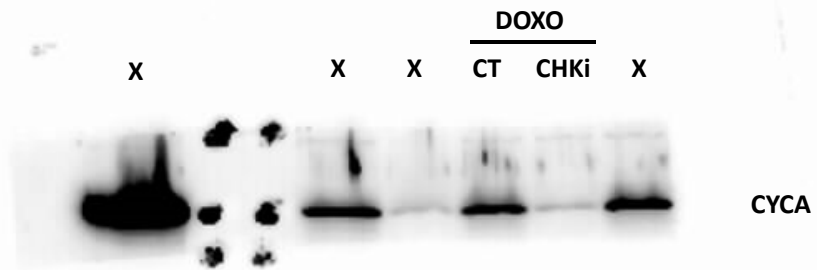



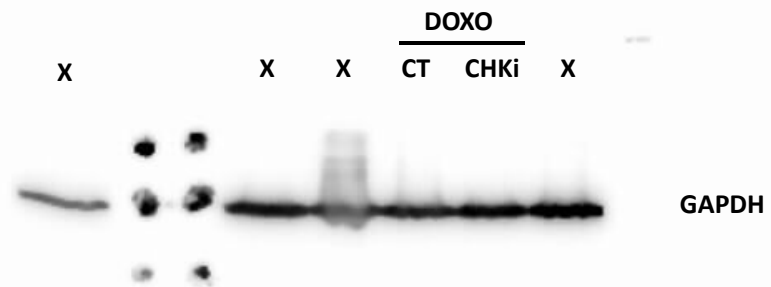

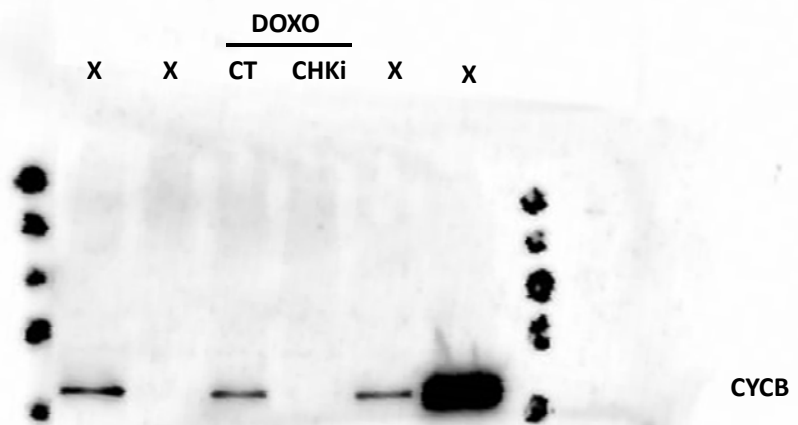

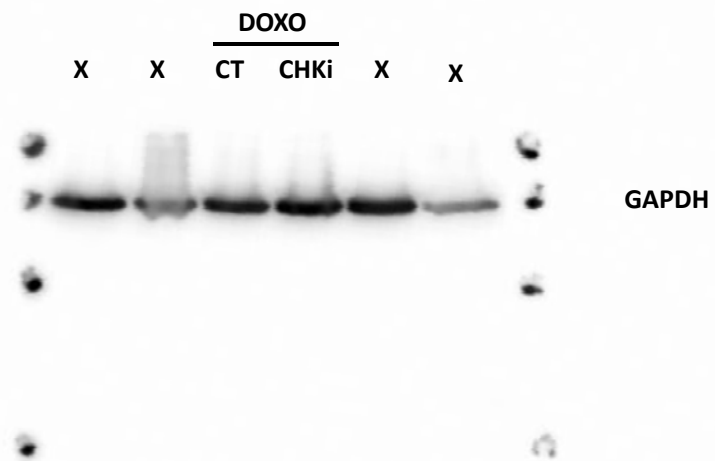

X X X X X X X X X DOXO  
CT CHKi X

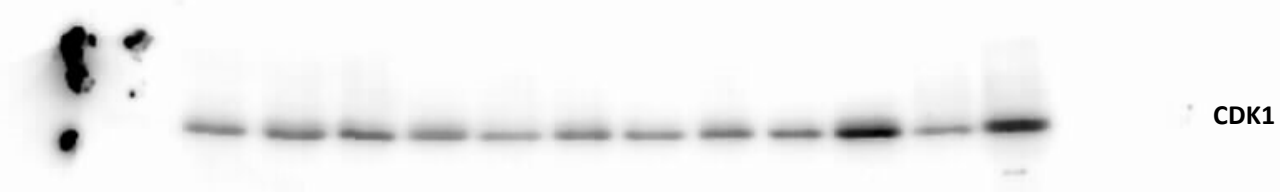

CDK1

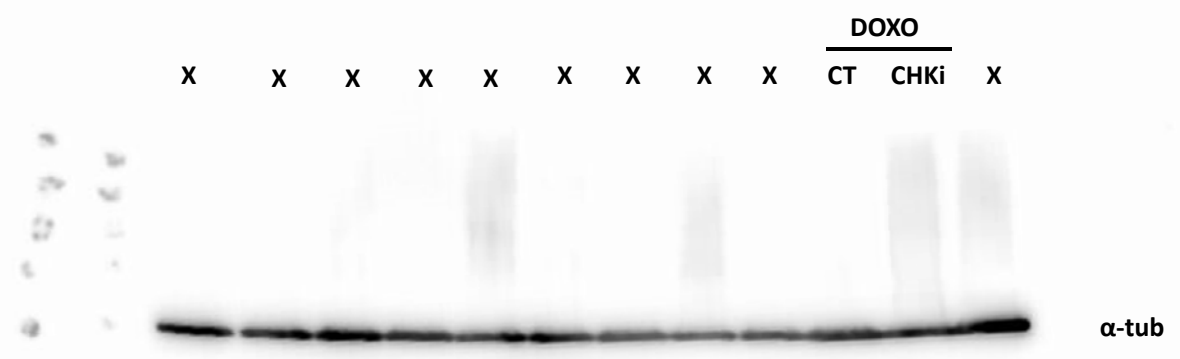

Supplement: 41420_2023_1330_MOESM3_ESM.pdf [file 41420_2023_1330_MOESM3_ESM.pdf]
